# Supplementary material for: Impact of Interactive Web-Based Education With Mobile and Email-Based Support of General Practitioners on Treatment and Referral Patterns of Patients with Atopic Dermatitis: Randomized Controlled Trial
Source: J Med Internet Res. 2012 Dec 5;14(6):e171. doi: 10.2196/jmir.2359 (PMC3849841; doi:10.2196/jmir.2359)
Supplement: Supplementary file 2 [file jmir_v14i6e171_app2.pdf]

### Question 1

Is the patient a child (ie, less than 18 years old) or adult?

- ☐ Child
- ☐ Adult

### Question 2

What kind of treatment did you prescribe to the patient? (several options possible)

- ☐ Emollients
- ☐ Potassiumpermanganate bath
- ☐ Dressings (including Burow's facial dressing)
- ☐ Topical steroid cream/ointment
- ☐ Protopic / Elidel (calcineurin inhibitors)
- ☐ Wet-wraps
- ☐ Antihistamine
- ☐ Oral antibiotics
- ☐ Oral steroids
- ☐ Elimination diet

### Question 3

In case you ticked "Topical steroid cream / ointment" in question 2, of which potency was the prescribed topical steroid?

- ☐ Class 1
- ☐ Class 2
- ☐ Class 3
- ☐ Class 4
- ☐ Don't know

### Question 4

In case you ticked "Topical steroid cream / ointment" in question 2, for how long should the patient use topical steroids? Please state the number of days of recommended steroid therapy including tapering-off.

\_\_\_\_\_

### Question 5

Are you referring the patient to a specialist?

- ☐ No.
- ☐ Yes, to a pediatrician.
- ☐ Yes, to a dermatologist.

### Question 6

In case you are referring the patient to a specialist, what is the reason for referral?

- ☐ Uncertainty about the diagnosis
- ☐ Flare-up
- ☐ Poor treatment effect
- ☐ Allergy investigation needed
- ☐ Other

### Question 7

Additional comments on the treatment.

\_\_\_\_\_
